# Supplementary material
Source: Research Square preprint supplement (doi:10.21203/rs.3.rs-9713997/v1)

# Uncropped Western Blot for Figure 4C

PAI-1 (48kDa)

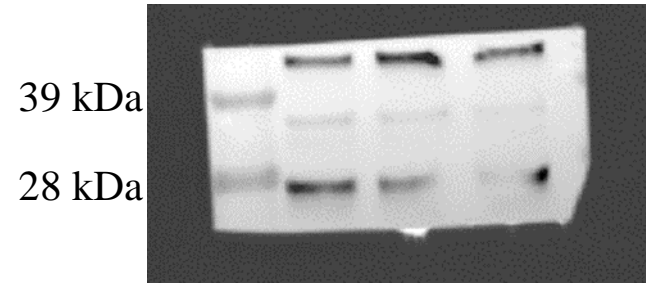

IL-6 (21-28kDa)

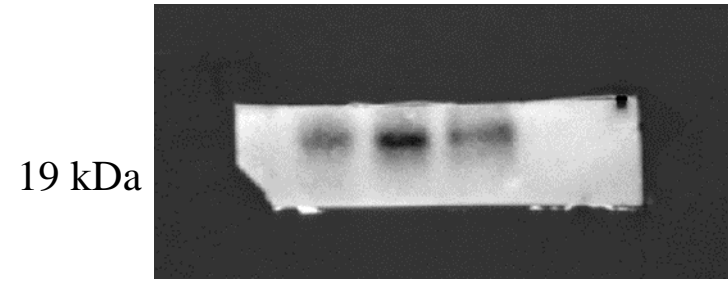

IL-1 $\beta$  (32kDa)

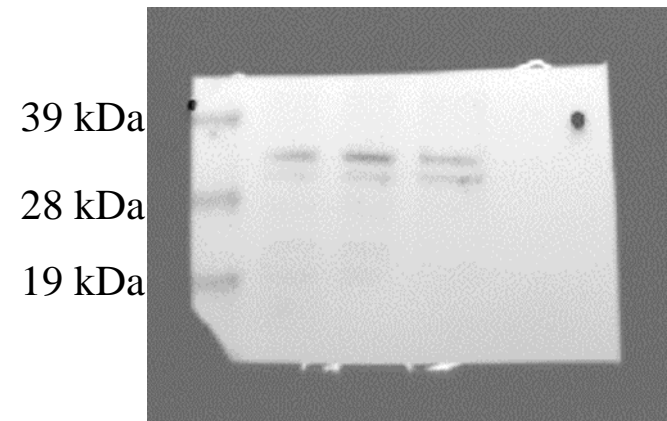

Vinculin (124 kDa)

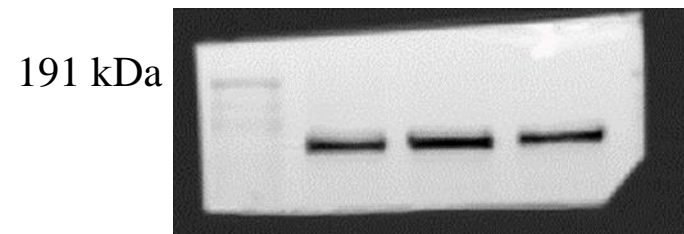

# Uncropped Western Blot for Figure 5C

PAI-1 (48kDa)

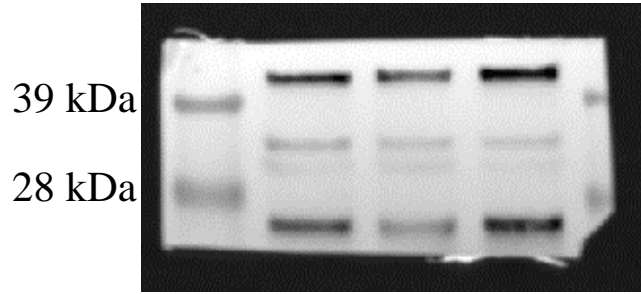

p21 (21kDa)

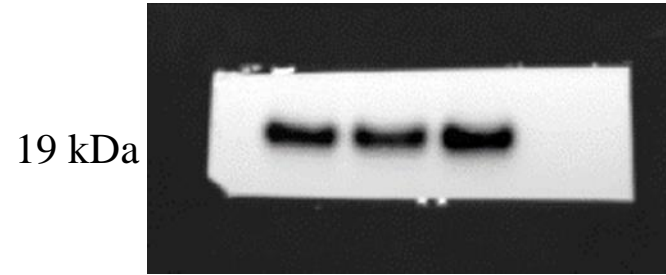

Vinculin (124 kDa)

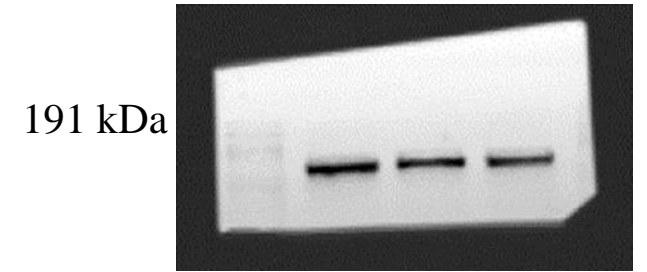

IL-1 $\beta$  (32kDa)

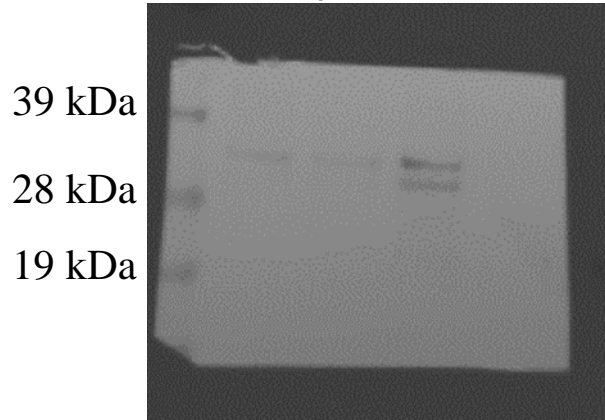

CXCL1 (11kDa)

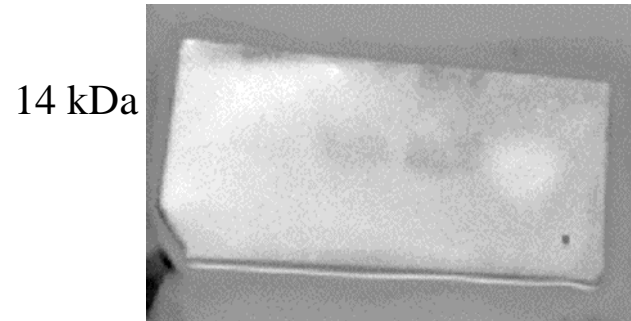

IL-8 (11kDa)

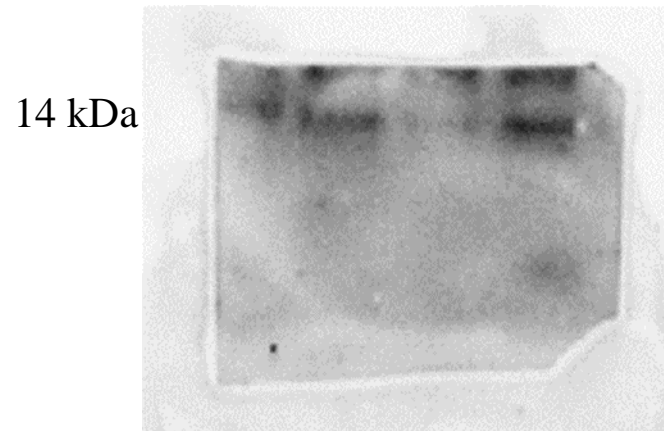

IL-6 (21-28kDa)

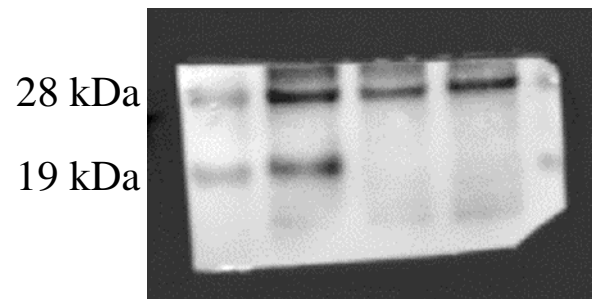

Supplement: Supplementary file 2 [file e0125c461d401ffa9de09572.pdf]
